# Supplementary material
Source: publisher figshare collection journal article supplement (https://sage.figshare.com/ndownloader/files/13765262)
Supplement: Supplementary file 1 [file 13765262]

**Table 2 Recommendations on how to reduce delay in start of breast cancer treatment**

|  | **Recommendations** | **Spread of views** |
| --- | --- | --- |
| 1 | ***Health service delivery***  (1) Spreading breast cancer patients across different days of the week for maximum attention to be given to each patient.  (2) Concentration of breast cancer treatment at KBTH in one building so as to streamline the processes involved in diagnosis and relieve the frustrations patients go through in the hospital.  (3) Public education on causes and symptoms of breast cancer so as to facilitate early presentation and treatment. | Some members (FGDs 1, 2 and 3) |
| 2 | ***Health workforce*** (1) Appropriate follow-up of patients by health professionals to monitor their welfare.  (2) Appropriate intervention (such as increasing the number of health workers) at the Pathology Unit to reduce delay in getting biopsy results.  (3) Explanation of breast cancer treatment procedures to patients for them to make informed decision on the most appropriate treatment.  (4) Motivation of health workers through commission so as to reduce corruption and encourage them to provide quality health service to patients. | Some members (All groups) |
| 3 | ***Financing*** (1) Assistance from government through subsidy on cost of treatment | FGDs 1 and 4 |
